# Supplementary material for: Health Care Utilization of US Medicare Beneficiaries Living with Parkinson’s Disease
Source: bioRxiv or medRxiv preprint supplement (doi:10.1101/2022.06.03.22275470), 2022-08-10
Supplement: Supplementary file [file media-1.pdf]

Supplemental Tables for Health Care Utilization of US Medicare Beneficiaries Living with Parkinson's Disease

| <b>Supplemental Table 1. Demographics of Medicare Enrollees by Number of Claims with a PD (G20) ICD-10 Diagnostic Code, 2019</b> |                   |                   |                  |
|----------------------------------------------------------------------------------------------------------------------------------|-------------------|-------------------|------------------|
|                                                                                                                                  | At Least 1 G20 Dx | At Least 2 G20 Dx | Exactly 1 G20 Dx |
|                                                                                                                                  | %                 | %                 | %                |
| <b>Sex</b>                                                                                                                       |                   |                   |                  |
| Female                                                                                                                           | 43.8              | 43.4              | 47.1             |
| Male                                                                                                                             | 56.2              | 56.6              | 52.9             |
| <b>Age</b>                                                                                                                       |                   |                   |                  |
| 70 and under                                                                                                                     | 22.1              | 21.6              | 26.1             |
| Over 70                                                                                                                          | 77.9              | 78.4              | 73.9             |
| <b>Race and Ethnicity</b>                                                                                                        |                   |                   |                  |
| Asian                                                                                                                            | 2.3               | 2.3               | 2.4              |
| Black                                                                                                                            | 5.9               | 5.7               | 7.7              |
| Hispanic                                                                                                                         | 2.7               | 2.6               | 2.9              |
| North American Native                                                                                                            | 0.3               | 0.3               | 0.4              |
| Other                                                                                                                            | 2.0               | 2.0               | 1.8              |
| Unknown                                                                                                                          | 1.6               | 1.6               | 1.4              |
| White                                                                                                                            | 85.2              | 85.4              | 83.4             |
| <b>Urbanicity</b>                                                                                                                |                   |                   |                  |
| Rural                                                                                                                            | 15.9              | 15.7              | 17.7             |
| Non-Rural                                                                                                                        | 84.1              | 82.2              | 82.3             |

| <b>Supplemental Table 2. Utilization of Mental Health Services as a Function of Physician Utilization, 2019</b> |                     |            |
|-----------------------------------------------------------------------------------------------------------------|---------------------|------------|
|                                                                                                                 | Clinical Psychology | Psychiatry |
|                                                                                                                 | %                   | %          |
| <b>MDS</b>                                                                                                      |                     |            |
| <i>MDS &gt;0</i>                                                                                                | 3.8                 | 3.7        |
| <b>General Neurology</b>                                                                                        |                     |            |
| <i>MDS=0, General Neurology &gt;0</i>                                                                           | 1.5                 | 2.3        |
| <b>PCP</b>                                                                                                      |                     |            |
| <i>MDS=0, General Neurology=0, PCP&gt;0</i>                                                                     | 0.6                 | 2.2        |
| <b>None</b>                                                                                                     |                     |            |
| <i>MDS=0, General Neurology=0, PCP=0</i>                                                                        | 0.7                 | 3.14       |
